# Supplementary material
Source: HighWire-hosted journal article supplement (https://jnm.snmjournals.org/highwire/filestream/95026/field_highwire_adjunct_files/0/177857_Supplemental_Data.pdf)
Supplement: 177857_Supplemental_Data.pdf [file 177857_Supplemental_Data.pdf]

**Supplemental Table 1.** PET ROI %ID/g values ( $\pm$ S.D.) for  $^{89}\text{Zr}$ -Df-Pembrolizumab in ICR mice (n = 4).

| Organ  | $^{89}\text{Zr}$ -Df-Pembro accumulation (%ID/g) at time post-injection (h) |                 |                 |                 |                 |                 |                 |                 |
|--------|-----------------------------------------------------------------------------|-----------------|-----------------|-----------------|-----------------|-----------------|-----------------|-----------------|
|        | 0.5 h                                                                       | 6 h             | 12 h            | 24 h            | 48 h            | 72 h            | 120 h           | 168 h           |
| Blood  | 16.4 $\pm$ 0.8                                                              | 10.2 $\pm$ 0.8  | 8.90 $\pm$ 0.60 | 8.48 $\pm$ 0.22 | 7.20 $\pm$ 0.55 | 6.95 $\pm$ 0.15 | 6.24 $\pm$ 0.41 | 5.48 $\pm$ 0.51 |
| Liver  | 8.48 $\pm$ 0.79                                                             | 6.90 $\pm$ 0.22 | 5.43 $\pm$ 0.90 | 5.05 $\pm$ 0.23 | 4.50 $\pm$ 0.35 | 4.25 $\pm$ 0.30 | 4.32 $\pm$ 0.33 | 3.40 $\pm$ 0.68 |
| Spleen | 6.20 $\pm$ 0.31                                                             | 5.10 $\pm$ 0.24 | 4.53 $\pm$ 0.11 | 4.75 $\pm$ 0.23 | 4.55 $\pm$ 0.30 | 4.30 $\pm$ 0.37 | 4.39 $\pm$ 0.57 | 4.10 $\pm$ 0.41 |
| Kidney | 8.03 $\pm$ 1.28                                                             | 5.95 $\pm$ 0.49 | 4.30 $\pm$ 1.21 | 3.70 $\pm$ 1.08 | 3.80 $\pm$ 0.30 | 3.15 $\pm$ 1.11 | 3.45 $\pm$ 0.84 | 3.65 $\pm$ 0.05 |
| Bone   | 3.85 $\pm$ 0.73                                                             | 3.23 $\pm$ 0.31 | 3.45 $\pm$ 0.21 | 3.43 $\pm$ 0.18 | 3.90 $\pm$ 0.35 | 4.53 $\pm$ 0.31 | 4.76 $\pm$ 0.62 | 5.15 $\pm$ 0.48 |
| Muscle | 0.65 $\pm$ 0.14                                                             | 1.07 $\pm$ 0.09 | 1.05 $\pm$ 0.11 | 1.28 $\pm$ 0.18 | 1.06 $\pm$ 0.20 | 0.99 $\pm$ 0.25 | 0.94 $\pm$ 0.17 | 0.97 $\pm$ 0.04 |

**Supplemental Table 2.** PET ROI %ID/g values ( $\pm$ S.D.) for  $^{89}\text{Zr}$ -Df-Pembrolizumab in Sprague Dawley rats (n = 4).

| Organ     | $^{89}\text{Zr}$ -Df-Pembro accumulation (%ID/g) at time post-injection (h) |                 |                 |                 |                 |                 |                 |                 |
|-----------|-----------------------------------------------------------------------------|-----------------|-----------------|-----------------|-----------------|-----------------|-----------------|-----------------|
|           | 0.5 h                                                                       | 6 h             | 12 h            | 24 h            | 48 h            | 72 h            | 120 h           | 168 h           |
| Blood     | 4.09 $\pm$ 0.31                                                             | 3.60 $\pm$ 0.44 | 2.92 $\pm$ 0.11 | 2.19 $\pm$ 0.14 | 1.74 $\pm$ 0.06 | 1.51 $\pm$ 0.07 | 1.27 $\pm$ 0.06 | 1.16 $\pm$ 0.10 |
| Liver     | 2.14 $\pm$ 0.15                                                             | 1.79 $\pm$ 0.20 | 1.39 $\pm$ 0.08 | 1.13 $\pm$ 0.14 | 0.97 $\pm$ 0.04 | 0.90 $\pm$ 0.04 | 0.97 $\pm$ 0.04 | 0.87 $\pm$ 0.06 |
| Spleen    | 1.89 $\pm$ 0.07                                                             | 1.84 $\pm$ 0.30 | 1.03 $\pm$ 0.21 | 0.95 $\pm$ 0.09 | 0.87 $\pm$ 0.08 | 0.85 $\pm$ 0.11 | 0.72 $\pm$ 0.13 | 0.71 $\pm$ 0.05 |
| Kidney    | 1.02 $\pm$ 0.23                                                             | 1.02 $\pm$ 0.14 | 1.02 $\pm$ 0.19 | 0.80 $\pm$ 0.09 | 0.76 $\pm$ 0.07 | 0.70 $\pm$ 0.08 | 0.69 $\pm$ 0.01 | 0.64 $\pm$ 0.08 |
| Lungs     | 0.36 $\pm$ 0.03                                                             | 0.51 $\pm$ 0.11 | 0.45 $\pm$ 0.05 | 0.45 $\pm$ 0.05 | 0.45 $\pm$ 0.02 | 0.47 $\pm$ 0.03 | 0.52 $\pm$ 0.05 | 0.42 $\pm$ 0.02 |
| Intestine | 0.74 $\pm$ 0.06                                                             | 0.66 $\pm$ 0.03 | 0.63 $\pm$ 0.03 | 0.47 $\pm$ 0.05 | 0.45 $\pm$ 0.03 | 0.44 $\pm$ 0.04 | 0.42 $\pm$ 0.04 | 0.42 $\pm$ 0.04 |
| Muscle    | 0.20 $\pm$ 0.03                                                             | 0.20 $\pm$ 0.03 | 0.20 $\pm$ 0.01 | 0.22 $\pm$ 0.03 | 0.23 $\pm$ 0.02 | 0.20 $\pm$ 0.02 | 0.19 $\pm$ 0.01 | 0.19 $\pm$ 0.02 |
| Ovaries   | 1.13 $\pm$ 0.21                                                             | 1.06 $\pm$ 0.31 | 0.88 $\pm$ 0.07 | 0.83 $\pm$ 0.18 | 0.92 $\pm$ 0.16 | 0.94 $\pm$ 0.23 | 0.86 $\pm$ 0.19 | 0.86 $\pm$ 0.19 |
| Brain     | 0.33 $\pm$ 0.04                                                             | 0.25 $\pm$ 0.07 | 0.24 $\pm$ 0.04 | 0.25 $\pm$ 0.05 | 0.26 $\pm$ 0.06 | 0.19 $\pm$ 0.02 | 0.23 $\pm$ 0.03 | 0.23 $\pm$ 0.05 |

**Supplemental Table 3.** PET ROI %ID/g values ( $\pm$ S.D.) for  $^{89}\text{Zr}$ -Df-Pembrolizumab in NSG mice (NSG mice reconstituted with h-PBMCs; n = 4).

| Organ          | $^{89}\text{Zr}$ -Df-Pembro accumulation (%ID/g) at time post-injection (h) |                 |                 |                 |                 |                 |                 |                 |
|----------------|-----------------------------------------------------------------------------|-----------------|-----------------|-----------------|-----------------|-----------------|-----------------|-----------------|
|                | 0.5 h                                                                       | 6 h             | 12 h            | 24 h            | 48 h            | 72 h            | 120 h           | 168 h           |
| Blood          | 21.8 $\pm$ 2.23                                                             | 16.0 $\pm$ 1.56 | 13.2 $\pm$ 0.66 | 11.8 $\pm$ 0.81 | 9.78 $\pm$ 0.78 | 9.73 $\pm$ 0.54 | 8.01 $\pm$ 0.45 | 6.83 $\pm$ 0.80 |
| Liver          | 12.9 $\pm$ 1.96                                                             | 11.2 $\pm$ 0.71 | 9.73 $\pm$ 0.58 | 8.45 $\pm$ 0.96 | 7.18 $\pm$ 0.19 | 6.48 $\pm$ 0.20 | 6.25 $\pm$ 0.62 | 6.33 $\pm$ 0.68 |
| Spleen         | 5.48 $\pm$ 0.71                                                             | 6.26 $\pm$ 1.50 | 6.08 $\pm$ 1.49 | 5.05 $\pm$ 1.73 | 6.75 $\pm$ 0.65 | 5.33 $\pm$ 0.53 | 4.88 $\pm$ 0.72 | 4.33 $\pm$ 0.18 |
| Kidney         | 8.81 $\pm$ 1.91                                                             | 8.53 $\pm$ 0.75 | 7.73 $\pm$ 0.62 | 6.75 $\pm$ 0.50 | 6.15 $\pm$ 0.53 | 5.15 $\pm$ 0.11 | 5.9 $\pm$ 0.70  | 5.08 $\pm$ 0.43 |
| Salivary Gland | 4.13 $\pm$ 0.13                                                             | 4.10 $\pm$ 0.46 | 4.55 $\pm$ 0.50 | 5.25 $\pm$ 0.48 | 4.65 $\pm$ 0.49 | 5.23 $\pm$ 0.36 | 4.93 $\pm$ 0.46 | 5.03 $\pm$ 0.59 |
| Muscle         | 0.74 $\pm$ 0.22                                                             | 0.88 $\pm$ 0.10 | 0.24 $\pm$ 0.04 | 1.05 $\pm$ 0.18 | 1.22 $\pm$ 0.17 | 1.10 $\pm$ 0.20 | 1.04 $\pm$ 0.22 | 0.94 $\pm$ 0.09 |

**Supplemental Table 4.** PET ROI %ID/g values ( $\pm$ S.D.) for  $^{89}\text{Zr}$ -Df-Pembrolizumab in PBL mice (NSG mice reconstituted with h-PBMCs; n = 4).

| Organ          | $^{89}\text{Zr}$ -Df-Pembro accumulation (%ID/g) at time post-injection (h) |                 |                 |                 |                 |                 |                 |                 |
|----------------|-----------------------------------------------------------------------------|-----------------|-----------------|-----------------|-----------------|-----------------|-----------------|-----------------|
|                | 0.5 h                                                                       | 6 h             | 12 h            | 24 h            | 48 h            | 72 h            | 120 h           | 168 h           |
| Blood          | 24.5 $\pm$ 1.35                                                             | 17.2 $\pm$ 1.63 | 13.8 $\pm$ 0.93 | 9.30 $\pm$ 0.51 | 6.13 $\pm$ 0.41 | 4.60 $\pm$ 0.56 | 3.20 $\pm$ 0.41 | 3.65 $\pm$ 0.59 |
| Liver          | 14.6 $\pm$ 0.40                                                             | 12.0 $\pm$ 0.83 | 11.0 $\pm$ 0.38 | 7.68 $\pm$ 0.64 | 7.65 $\pm$ 0.57 | 7.13 $\pm$ 0.33 | 7.33 $\pm$ 0.84 | 5.48 $\pm$ 0.76 |
| Spleen         | 10.3 $\pm$ 1.31                                                             | 8.05 $\pm$ 0.69 | 7.65 $\pm$ 0.30 | 5.10 $\pm$ 0.68 | 4.85 $\pm$ 0.40 | 4.50 $\pm$ 0.53 | 4.15 $\pm$ 0.80 | 3.85 $\pm$ 0.47 |
| Kidney         | 11.5 $\pm$ 0.53                                                             | 8.18 $\pm$ 1.27 | 6.68 $\pm$ 0.48 | 5.33 $\pm$ 0.66 | 5.13 $\pm$ 0.13 | 4.23 $\pm$ 0.44 | 3.73 $\pm$ 0.45 | 3.33 $\pm$ 0.66 |
| Salivary Gland | 3.43 $\pm$ 0.55                                                             | 5.48 $\pm$ 0.40 | 7.23 $\pm$ 0.20 | 8.23 $\pm$ 0.33 | 9.65 $\pm$ 0.66 | 10.7 $\pm$ 0.77 | 10.8 $\pm$ 0.72 | 11.1 $\pm$ 0.83 |
| Muscle         | 0.85 $\pm$ 0.15                                                             | 0.95 $\pm$ 0.11 | 0.88 $\pm$ 0.18 | 0.90 $\pm$ 0.31 | 0.95 $\pm$ 0.23 | 0.75 $\pm$ 0.15 | 0.88 $\pm$ 0.26 | 0.95 $\pm$ 0.21 |

**Supplemental Table 5.** Estimated radiation absorbed doses to an adult human after intravenous injection of  $^{89}\text{Zr}$ -Df-Pembrolizumab, based on PET imaging data obtained in ICR mice (n = 4).

| Organ                               | mGy/MBq (S.D.) |         | rad/mCi (S.D.) |         |
|-------------------------------------|----------------|---------|----------------|---------|
| Adrenals                            | 0.025          | (0.001) | 0.093          | (0.001) |
| Brain                               | 0.240          | (0.006) | 0.889          | (0.023) |
| Breasts                             | 0.159          | (0.002) | 0.588          | (0.006) |
| Small Intestine                     | 0.022          | (0.001) | 0.080          | (0.001) |
| Stomach Wall                        | 0.533          | (0.005) | 1.970          | (0.019) |
| Kidneys                             | 0.025          | (0.001) | 0.091          | (0.005) |
| Liver                               | 0.811          | (0.036) | 2.999          | (0.135) |
| Lungs                               | 0.494          | (0.004) | 1.829          | (0.016) |
| Muscle                              | 0.019          | (0.001) | 0.069          | (0.001) |
| Ovaries                             | 1.425          | (0.018) | 5.273          | (0.065) |
| Pancreas                            | 0.024          | (0.001) | 0.090          | (0.001) |
| Red Marrow                          | 0.574          | (0.012) | 2.122          | (0.046) |
| Skin                                | 0.344          | (0.005) | 1.271          | (0.018) |
| Spleen                              | 0.016          | (0.001) | 0.058          | (0.001) |
| Thymus                              | 0.021          | (0.001) | 0.078          | (0.001) |
| Thyroid                             | 0.565          | (0.009) | 2.091          | (0.033) |
| Urinary Bladder Wall                | 0.512          | (0.007) | 1.894          | (0.027) |
| Uterus                              | 0.023          | (0.001) | 0.086          | (0.001) |
| Total Body Effective Dose (mSv/MBq) | 0.515 (0.005)  |         |                |         |

**Supplemental Table 6.** Estimated radiation absorbed doses to an adult human after intravenous injection of <sup>89</sup>Zr-Df-Pembrolizumab, based on PET imaging data obtained in Sprague Dawley rats (n = 4).

| Organ                               | mGy/MBq (S.D.) |         | rad/mCi (S.D.) |         |
|-------------------------------------|----------------|---------|----------------|---------|
|                                     | Adrenals       | 0.017   | (0.006)        | 0.062   |
| Brain                               | 0.538          | (0.882) | 1.991          | (0.263) |
| Breasts                             | 0.179          | (0.001) | 0.662          | (0.005) |
| Small Intestine                     | 0.019          | (0.008) | 0.072          | (0.028) |
| Stomach Wall                        | 0.621          | (0.009) | 2.299          | (0.033) |
| Kidneys                             | 0.017          | (0.007) | 0.061          | (0.025) |
| Liver                               | 0.958          | (0.077) | 3.543          | (0.286) |
| Lungs                               | 0.523          | (0.010) | 1.934          | (0.038) |
| Muscle                              | 0.012          | (0.005) | 0.045          | (0.018) |
| Ovaries                             | 1.363          | (0.010) | 5.041          | (0.038) |
| Pancreas                            | 0.018          | (0.007) | 0.065          | (0.025) |
| Red Marrow                          | 0.524          | (0.009) | 1.938          | (0.033) |
| Skin                                | 0.365          | (0.006) | 1.350          | (0.022) |
| Spleen                              | 0.109          | (0.103) | 0.402          | (0.382) |
| Thymus                              | 0.015          | (0.006) | 0.054          | (0.021) |
| Thyroid                             | 0.593          | (0.011) | 2.192          | (0.042) |
| Urinary Bladder Wall                | 0.578          | (0.006) | 2.137          | (0.021) |
| Uterus                              | 0.017          | (0.007) | 0.062          | (0.024) |
|                                     |                |         |                |         |
| Total Body Effective Dose (mSv/MBq) | 0.540 (0.008)  |         |                |         |

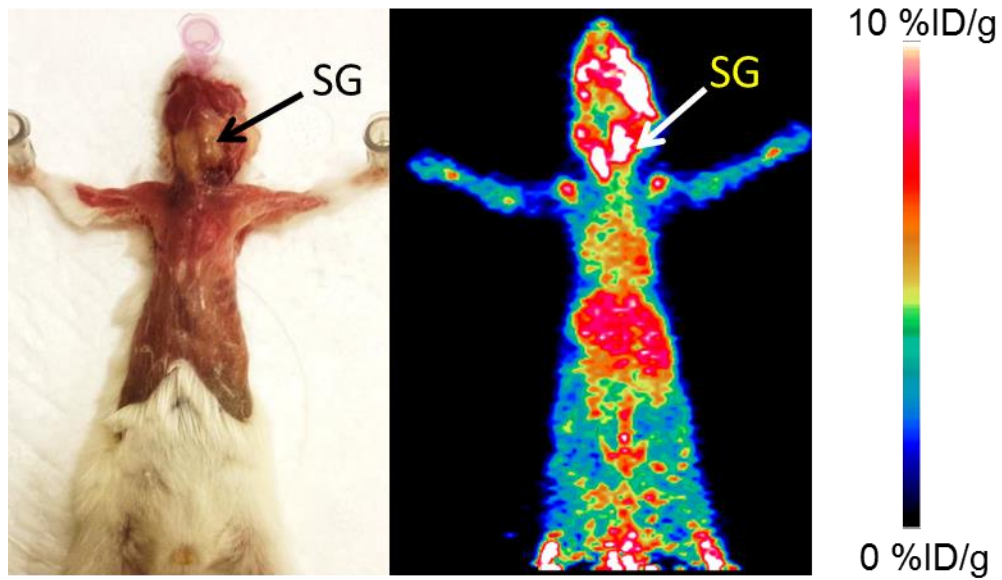

**SUPPLEMENTAL FIGURE 1.** The salivary glands were visualized by extraction and removal of skin. PET imaging was performed on the euthanized PBL mouse. The salivary glands clearly showed high PET uptake. Additional signal was attributed to a combination of the lacrimal glands and saliva.
